# Supplementary material for: Pemafibrate Protects against Fatty Acid-Induced Nephropathy by Maintaining Renal Fatty Acid Metabolism
Source: MDPI journal article supplement (doi:10.3390/metabo11060372), 2021-06-09
Supplement: s1 [file s1]

## Supplementary Materials

**Supplementary table S1.** Results of blood tests in experiment 1.

|     | TP (g/dL)           | ALB (g/dL)          | ALT (IU/L)          | TG (mg/dL)                       | HDL (mg/dL)                      | LDL (mg/dL)         | BUN (mg/dL)                      | Cr (mg/dL)          | FFA (mEq/L)         |
|-----|---------------------|---------------------|---------------------|----------------------------------|----------------------------------|---------------------|----------------------------------|---------------------|---------------------|
| Veh | 5.20 ( $\pm 0.12$ ) | 0.60 ( $\pm 0.03$ ) | 35.4 ( $\pm 4.02$ ) | 99.9 ( $\pm 12.8$ )              | 57.5 ( $\pm 2.68$ )              | 5.36 ( $\pm 0.30$ ) | 31.1 ( $\pm 0.89$ )              | 0.10 ( $\pm 0.01$ ) | 0.86 ( $\pm 0.13$ ) |
| PEM | 5.23 ( $\pm 0.07$ ) | 0.64 ( $\pm 0.02$ ) | 41.9 ( $\pm 4.48$ ) | 41.0 ( $\pm 4.15$ ) <sup>#</sup> | 70.1 ( $\pm 2.09$ ) <sup>#</sup> | 4.79 ( $\pm 0.29$ ) | 35.1 ( $\pm 1.22$ ) <sup>#</sup> | 0.10 ( $\pm 0.00$ ) | 0.78 ( $\pm 0.11$ ) |

Significant differences with the Veh group are indicated with # ( $P < 0.05$ ). Abbreviations: TP, total protein; ALB, albumin; ALT, alanine aminotransferase; TG, serum triglyceride; HDL, high-density lipoprotein; LDL, low-density lipoprotein; BUN, blood urea nitrogen; Cr, creatinine; FFA, free fatty acid.

**Supplementary figure S1.** Other results in experiment 1.

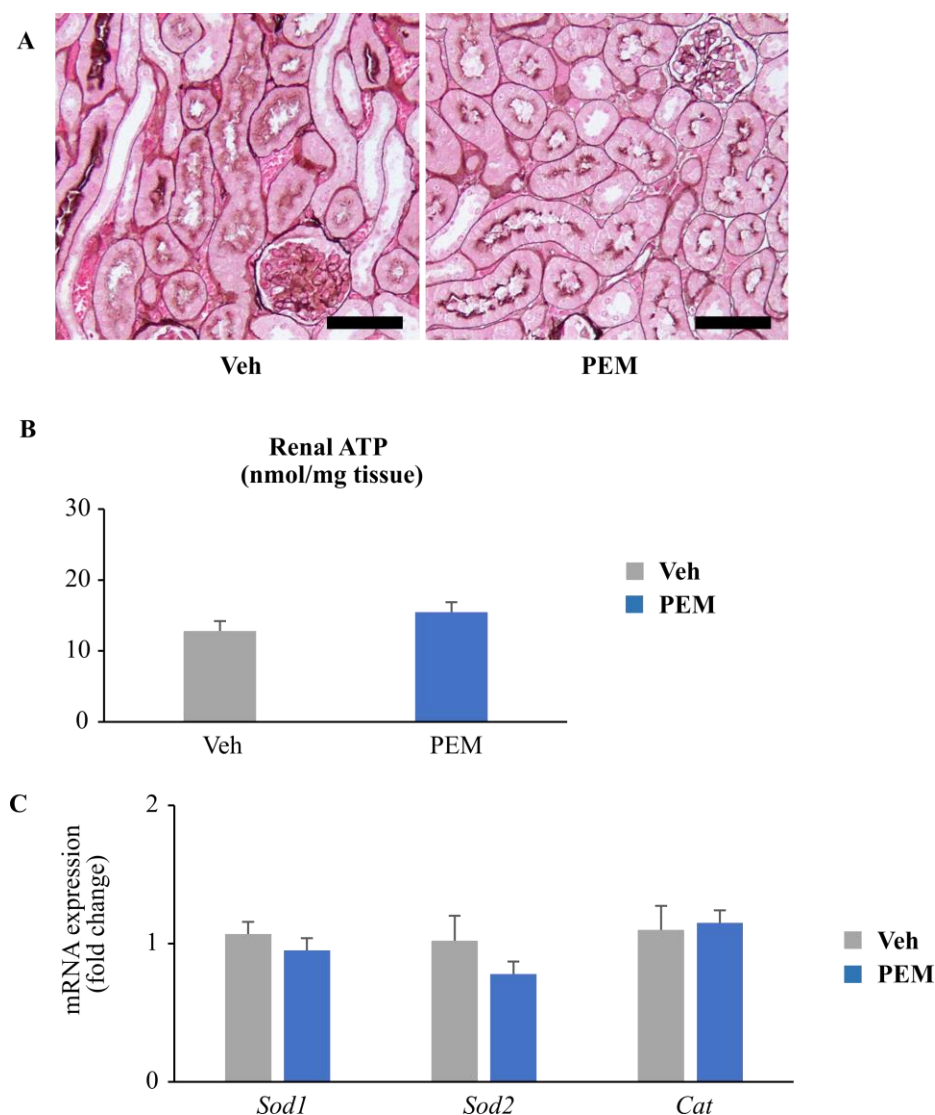

Other results in experiment 1. (A) Light microscopic analysis of tubular lesions. The sections were stained with periodic acid-methenamine-silver. Scale bar = 100  $\mu$ m. (B) Renal adenosine triphosphate content. (C) Renal expressions of mRNA related to antioxidant agents. In those analysis, any obvious or significant differences was not detected between the Veh and PEM group.

**Supplementary table S2.** Results of blood tests in experiment 2.

|            | TP (g/dL)             | ALB (g/dL)            | ALT (IU/L)            | TG (mg/dL)            | HDL (mg/dL)           | LDL (mg/dL)           |
|------------|-----------------------|-----------------------|-----------------------|-----------------------|-----------------------|-----------------------|
| CON        | 4.98 ( $\pm 0.11$ ) # | 0.53 ( $\pm 0.02$ ) # | 32.0 ( $\pm 4.86$ ) # | 110 ( $\pm 12.1$ )    | 59.9 ( $\pm 2.39$ ) # | 8.79 ( $\pm 1.97$ ) # |
| FAON       | 10.6 ( $\pm 0.39$ )   | 1.51 ( $\pm 0.07$ )   | 13.3 ( $\pm 2.06$ )   | 80.3 ( $\pm 14.3$ )   | 16.4 ( $\pm 1.94$ )   | 2.62 ( $\pm 0.51$ )   |
| PEM + FAON | 10.2 ( $\pm 0.40$ )   | 1.50 ( $\pm 0.08$ )   | 15.8 ( $\pm 4.66$ )   | 34.9 ( $\pm 10.6$ ) # | 22.3 ( $\pm 3.00$ )   | 1.50 ( $\pm 0.17$ )   |

Significant differences with the FAON group are indicated with # ( $P < 0.05$ ). Abbreviations: TP, total protein; ALB, albumin; ALT, alanine aminotransferase; TG, serum triglyceride; HDL, high-density lipoprotein; LDL, low-density lipoprotein.

**Supplementary figure S2.** Pathological findings in glomeruli in experiment 2.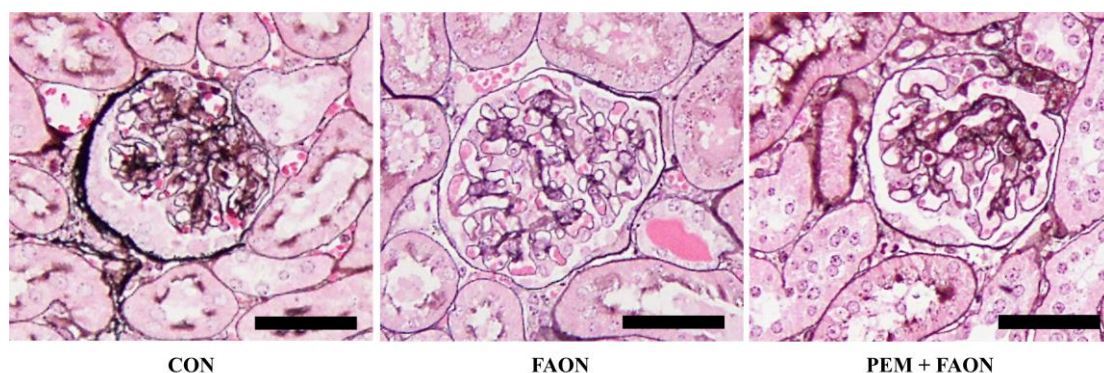

Light microscopic analysis of glomeruli. The sections were stained with periodic acid-methenamine-silver. Scale bar = 100  $\mu\text{m}$ .

**Supplementary table S3.** Primers used in mRNA analyses.

| Gene          |         |     | Primer                      |     | GenBank accession no. |
|---------------|---------|-----|-----------------------------|-----|-----------------------|
| <i>Ppara</i>  | Forward | 5'- | CCTCAGGGTACCACTACGGAGT      | -3' | NM_011144             |
|               | Reverse | 5'- | GCCGAATAGTTCGCCGAA          | -3' |                       |
| <i>Cpt2</i>   | Forward | 5'- | ATCGTACCCACCATGCACTAC       | -3' | NM_009949             |
|               | Reverse | 5'- | CTGTCATTCAAGAGAGGCTTCTG     | -3' |                       |
| <i>Acadvl</i> | Forward | 5'- | GCGTGTGCTCCGAGATATTC        | -3' | NM_017366             |
|               | Reverse | 5'- | CCAGTGAGTTCCTTTCCTTTG       | -3' |                       |
| <i>Acadm</i>  | Forward | 5'- | TGCTTTTGATAGAACCAGACCTACAGT | -3' | NM_007382             |
|               | Reverse | 5'- | CTTGGTGCTCCACTAGCAGCTT      | -3' |                       |
| <i>Hadha</i>  | Forward | 5'- | CCTTTATCCTGCCCCCTTTG        | -3' | NM_178878             |
|               | Reverse | 5'- | GCGATTCAGCAAGATAACCA        | -3' |                       |
| <i>Acox1</i>  | Forward | 5'- | TGGTATGGTGTCTGTAATTGAATGAC  | -3' | NM_015729             |
|               | Reverse | 5'- | AATTTCTACCAATCTGGCTGCAC     | -3' |                       |
| <i>Ehhadh</i> | Forward | 5'- | CGATACTCTTCCCCCACTACCA      | -3' | NM_023737             |
|               | Reverse | 5'- | CAGTTACCAACAACGACTCCAATC    | -3' |                       |
| <i>Acaa1</i>  | Forward | 5'- | TCTACGGTCAACAGACAGTGTTC     | -3' | NM_146230             |
|               | Reverse | 5'- | GGCCATGCCAATGTCATAAGA       | -3' |                       |
| <i>Sod1</i>   | Forward | 5'- | AAGCGGTGAACCAGTTGTGTT       | -3' | NM_011434             |
|               | Reverse | 5'- | AGCCTTGTGTATTGTCCCCATACT    | -3' |                       |
| <i>Sod2</i>   | Forward | 5'- | TCCCAGACCTGCCTTACGACTAT     | -3' | NM_013671             |
|               | Reverse | 5'- | GGTGGCGTTGAGATTGTTCA        | -3' |                       |
| <i>Cat</i>    | Forward | 5'- | CGACCAGGGCATCAAAACTT        | -3' | NM_009804             |
|               | Reverse | 5'- | AACGTCCAGGACGGGTAATTG       | -3' |                       |
| <i>Actb</i>   | Forward | 5'- | GCCTTCCTTCTTGGGTATGG        | -3' | NM_007393             |
|               | Reverse | 5'- | GTGTTGGCATAGAGGTCTTTACG     | -3' |                       |

Abbreviations: *Ppara* (PPAR $\alpha$ ), peroxisome proliferator activated receptor alpha; *Cpt2* (CPT2), carnitine palmitoyl-transferase 2; *Acadvl* (VLCAD), very long-chain acyl-CoA dehydrogenase; *Acadm* (MCAD), medium-chain acyl-CoA dehydrogenase; *Hadha* (TP $\alpha$ ), mitochondrial trifunctional protein  $\alpha$  subunits; *Acox1* (ACOX), acyl-CoA oxidase; *Ehhadh* (PH), L-peroxisomal bifunctional protein; *Acaa1* (PT), peroxisomal 3-ketoacyl-CoA thiolase; *Sod1* (SOD1), superoxide dismutase 1; *Sod2* (SOD2), superoxide dismutase 2; *Cat* (Catalase); *Actb* ( $\beta$ -actin).
